# Supplementary material for: High-resolution epidemic simulation using within-host infection and contact data
Source: Springer Nature journal article supplement (doi:10.1186/s12889-018-5709-x), 2018-07-17

Vaccine coverage

- 85%
- 33%

Index case >>

R0

1.5  
1.0  
0.5  
0.0

-5 -4 -3 -2 -1 -1w. 1w. 1 2 3 4 5 Control

Vaccination time in months (w.: week)

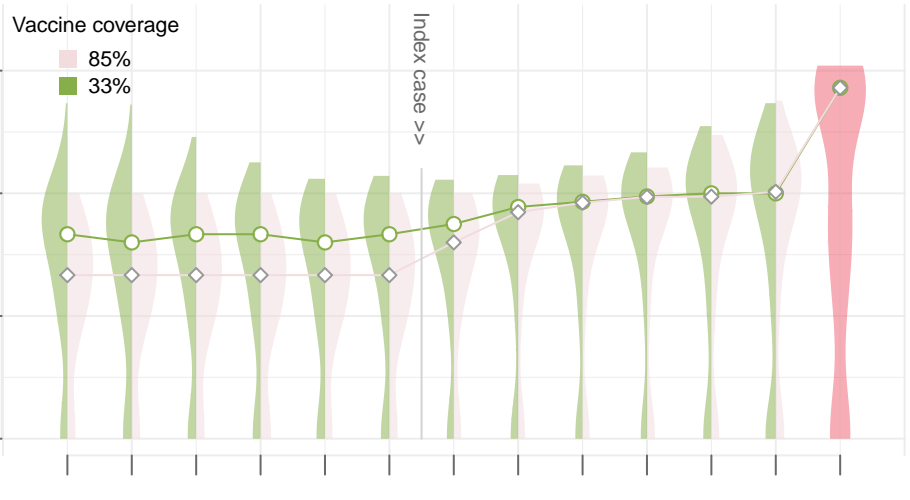

Supplement: MOESM1 [file 15959580]
