# Supplementary material for: High-resolution epidemic simulation using within-host infection and contact data
Source: Springer Nature journal article supplement (doi:10.1186/s12889-018-5709-x), 2018-07-17

Case-fatality rate

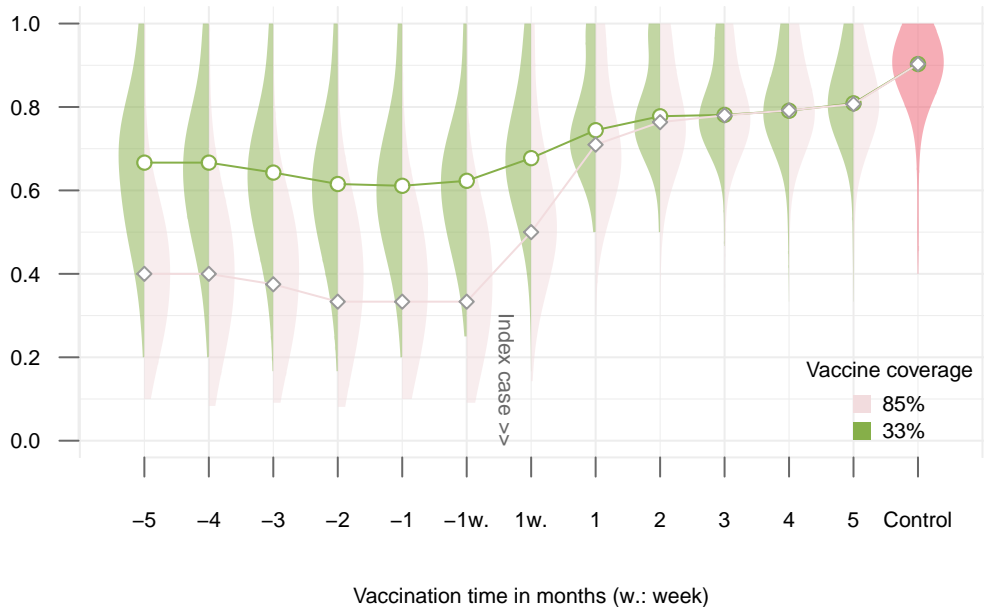

Supplement: MOESM2 [file 12889_2018_5709_MOESM2_ESM.pdf]
